# Supplementary material
Source: publisher site journal article supplement (https://www.spandidos-publications.com/2347/downloadSupplementary)
Supplement: Supplementary file 1 [file downloadSupplementary]

Figure S1. H&E-stained section of patients with atypical lymphoid infiltrate filling dermis, that stained positively for CD3, with a CD4 to CD8 ratio of  $>5$ . This patient had clonal rearrangement of the T cell receptor on PCR, and progressive clinical plaques. The findings support a consensus diagnosis of plaque-stage mycosis fungoides. H&E, hematoxylin and eosin, magnification, x100.

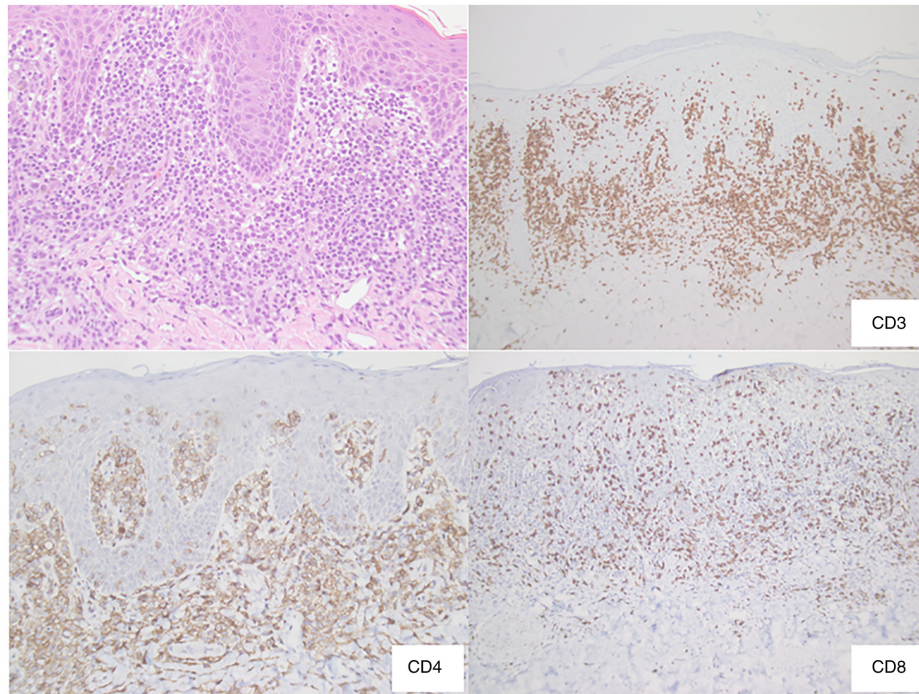

Figure S2. High-throughput sequencing report on a patient with plaque-stage mycosis fungoides, showing two clonal sequences identified, and their frequency in lesional tissue collected over two time periods. The finding of the same clonal sequence in two temporally distinct biopsies is further supportive of a diagnosis of mycosis fungoides.

#### DIAGNOSTIC SEQUENCE(S)

| Seq | Diagnostic sequence                                                                     |
|-----|-----------------------------------------------------------------------------------------|
| S1  | TTGGAGATCCAGCGCACAGAGCAGGGGGACTCGGCCATGTATCTCTGTGCCAGCAGCCGGACAGGGGAGACCCAGTACTTCGGGCCA |
| S2  | TCTGACGATCCAGCGCACAGCAGGAGGACTCGGCCGTGTATCTCTGTGCCAGCAGCTTAGCCGGGATACGCAGTATTTTGCCCA    |

#### RESULTS

Bars are log scaled

| Collection date | Sample name                 | Sequence-bearing clone(s) 1 million nucleated cells                               |         |                                                                                   |        |
|-----------------|-----------------------------|-----------------------------------------------------------------------------------|---------|-----------------------------------------------------------------------------------|--------|
|                 |                             | S1                                                                                |         | S2                                                                                |        |
| 10/19/2017      | 21222-01SB-SP-17-0013198_B1 |  | 153,902 |  | 76,318 |
| 08/17/2017      | 21222-01SB-SP-17-0010403B1  |  | 100,780 |  | 42,672 |
| 08/17/2017      | 21222-01SB-SP-17-0010403C1  |  | 72,483  |  | 30,572 |

If collection date was not known, an approximation based upon the order was used.

#### INTERPRETATION

Genomic DNA was extracted from a skin biopsy. The two TCRB sequences identified as dominant in the current sample were the same two sequences previously identified as dominant in two prior skin biopsies 0010403B1 and C1 from 08/17/2017.

The sequences were detected at levels approximately 1.5x higher in the current sample than in the previous biopsies.
